# Supplementary material
Source: Springer Nature journal article supplement (https://www.springermedizin.de/resource/supplementary/12943_2010_904_MOESM11_ESM.pdf/9551960)

HPV18 (p53-56)

HPV16 (p52)

cPIK3CA

20 $\mu$ M Ly

mock

siPIK3CA

nontarg

20 $\mu$ M Ly

mock

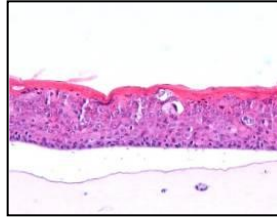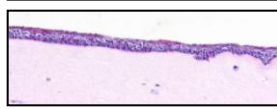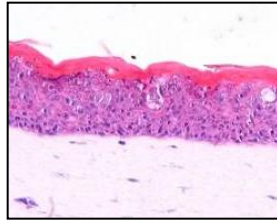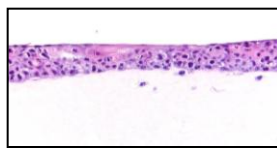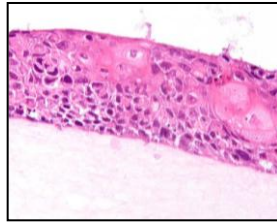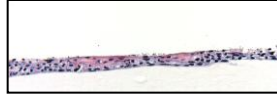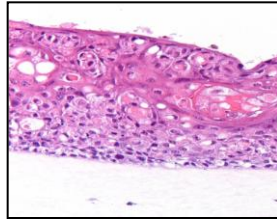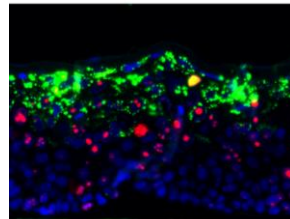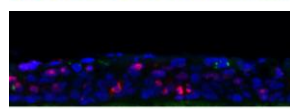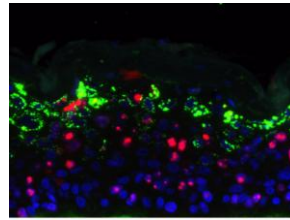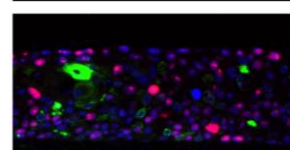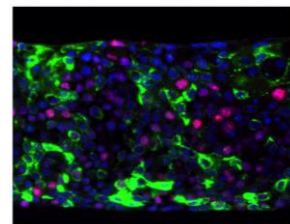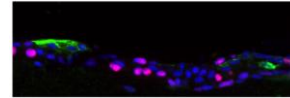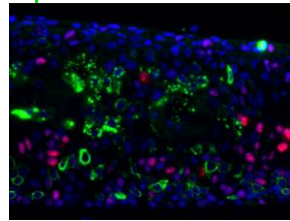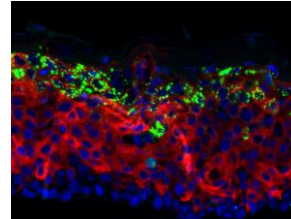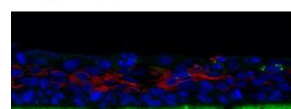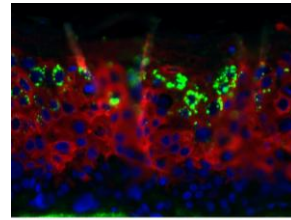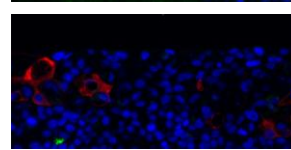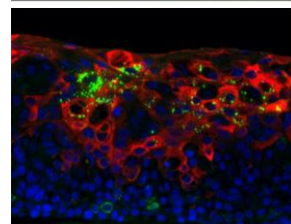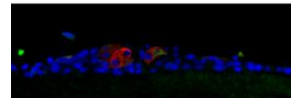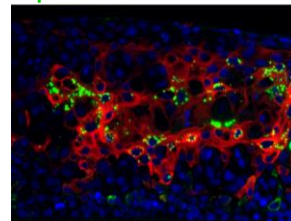

**A**

**B**

pAkt+Ki67+DAPI

**C**

pAkt+K10+DAPI

Supplement: MOESM11 [file 9551960]
